1 **Modular dynamics of DNA co-methylation networks**  
2 **exposes the functional organization of colon cancer**  
3 **cells' genome**

4 **Authors:**

5 Izaskun Mallona<sup>1,\*,\$</sup>, Susanna Aussó<sup>2</sup>, Anna Díez-Villanueva<sup>1,2</sup>, Víctor Moreno<sup>2</sup>, Miguel A.  
6 Peinado<sup>1,\*</sup>

7 **Affiliations:**

8 1 Health Research Institute Germans Trias i Pujol (IGTP), Program in Predictive and  
9 Personalized Medicine of Cancer. Badalona, Spain .

10 2 Unit of Biomarkers and Susceptibility, Cancer Prevention and Control Program, Catalan  
11 Institute of Oncology (ICO), Oncobell Program, Bellvitge Biomedical Research Institute  
12 (IDIBELL) and CIBERESP, L'Hospitalet de Llobregat, Barcelona, Spain; Department of  
13 Clinical Sciences, Faculty of Medicine and Health Sciences, University of Barcelona,  
14 Barcelona, Spain.

15 **\* Correspondence:**

16 Miguel A. Peinado, email: [mpeinado@igtp.cat](mailto:mpeinado@igtp.cat) (Lead contact)

17 Izaskun Mallona, email: [izaskun.mallona@gmail.com](mailto:izaskun.mallona@gmail.com)

18 **\$ Current affiliation:**

19 SIB Swiss Institute of Bioinformatics, Zurich, Switzerland

## 20 **Summary**

21 DNA methylation dynamics is intrinsically interconnected with processes underlying the  
22 malignant properties of cancer cells. By applying network-based approaches in two series of  
23 colorectal cancers we dissected the long-range co-methylation structure finding consistent  
24 patterns of compartmentalization in both normal and tumor tissues. Large transchromosomal  
25 modules showed unique regulatory signatures and coalesced into a structured network and  
26 allowing simple patient stratification. Normal-tumor comparison revealed substantial  
27 remodeling of specific modules and migration of subsets of co-methylating sites denoted by  
28 functional aggregates, pointing out potential sources of epigenetic and phenotypic variability.  
29 We conclude that DNA methylation dynamics architecture embodies interpretable  
30 information that can be used as a proxy of the drivers and the phenotypes of malignant  
31 transformation.

## 32 **Significance**

33 DNA methylation is a key epigenetic mark directly involved in genome organization and  
34 regulation. DNA methylation profiles are variable and are extensively altered in most cancers.  
35 We show that DNA methylation variability follows a transchromosomal modular dynamics in  
36 both normal and colon cancer cells. The reshaping of the DNA methylation variability  
37 network in tumorigenesis exposes genomic and functional associations and points out both the  
38 mechanisms and the phenotypes of individual tumors. This information may be used for  
39 patient stratification and identification of disrupted pathways and therapeutic targets.

## 40 **Highlights**

- 41 • DNA methylation variability displays a modular architecture in normal and cancer.
- 42 • Coordinated transchromosomal variations supersede regional DNA methylation  
43 dynamics.
- 44 • Co-methylation network modularity evinces functional and structural features.
- 45 • Epigenetic rewiring can be used as patient stratifier.

## 46 **Keywords**

47 DNA methylation, co-methylation, epigenetics, networks, colon, colorectal, cancer

- 48 **Running title**
- 49 DNA co-methylation architecture in colon cancer
- 50

## 51 **Introduction**

52 Cancer cell functional reprogramming involves gene expression dysregulation driven by  
53 genetic and epigenetic changes. The contribution of epigenetic mechanisms to malignant  
54 phenotypes has been thoroughly studied and includes extensive DNA methylation alterations  
55 as prominent features of most cancers types (Feinberg et al., 2016; Portela and Esteller, 2010).  
56 DNA methylation mainly occurs in the cytosine of the CpG dinucleotide and is usually  
57 associated with a repressed chromatin state. Changes in DNA methylation have multiple  
58 effects in genome regulation and have been directly associated with gene overexpression and  
59 silencing, chromatin remodeling and chromosomal instability (Eden et al., 2003; Feinberg et  
60 al., 2016; Jones, 2012; Rodriguez et al., 2006; Schubeler, 2015). Direct comparison of the  
61 DNA methylation profiles in the tumor versus the paired normal tissue reveals both losses  
62 (hypomethylation) and gains (hypermethylation) of the epigenetic mark. The extent of the  
63 change may range from discrete sites and promoters to large regions (Feinberg et al., 2016;  
64 Frigola et al., 2006; Hansen et al., 2011; Jones, 2012; Portela and Esteller, 2010).

65 Neighboring CpGs have a higher chance of being similarly methylated (Barrera and Peinado,  
66 2012; Eckhardt et al., 2006; Libertini et al., 2016; Shoemaker et al., 2010); nonetheless, the  
67 actual extent of this vicinity effect is disputed, with reports of complete to weak or very low  
68 decay of co-methylation as the genomic distance increases in different cell types and tissues  
69 (Akulenko and Helms, 2013; Fortin and Hansen, 2015; Li et al., 2010; Salhab et al., 2018).  
70 Most studies about the functional impact of DNA methylation changes have focused the  
71 analysis on local effects on neighboring genes (Jones, 2012; Schubeler, 2015). More recently,  
72 taking advantage of the availability of genome-scale DNA methylation data from large  
73 datasets, the study of DNA co-methylation profiles has been addressed from different points  
74 of view, including the analysis of long range correlations (Akulenko and Helms, 2013; Fortin  
75 and Hansen, 2015; Zhang and Huang, 2017), gene centered analyses (Gao and Teschendorff,  
76 2017; Li et al., 2014) and modeling of DNA methylation variation (Jenkinson et al., 2017;  
77 Libertini et al., 2018; Rulands et al., 2018; Teschendorff and Relton, 2018).

78 We hypothesize that epigenetic phenotypes exposed by DNA methylation co-variation reveal  
79 the functional organization of human cancer cell's genome. To get insights into the structure,  
80 functional determinants and underlying mechanisms of DNA methylation dynamics, we  
81 examined the DNA methylomes of colon cancer patients by a novel network-based synthetic  
82 analysis. Recent leading studies have proposed network based elucidation of molecular  
83 determinants of disease (Creixell et al., 2015; Chen et al., 2014; Liu et al., 2016). Our

84 rationale is that cells subjected to complex physiopathological processes (e.g. tumor initiation  
85 and progression), albeit being highly heterogeneous, share common driver and passenger  
86 events from which biologically relevant phenotypic traits arise. Concomitantly, the linkage  
87 between the events and the emergence of relevant traits alters the epigenome. The  
88 heterogeneity of the samples, which might be classified in a wide assortment of states and  
89 transitions, challenges the final state-focused differential methylation analysis (the one  
90 resulting in regional hyper- or hypomethylations), whilst favoring more process-oriented,  
91 flexible co-variation analysis, which also unfolds variability. Here, we have scrutinized over  
92 300,000 individual CpGs in two colon cancer datasets to extract and characterize the highly  
93 connected co-methylation modules. The structural and functional insights of epigenomic  
94 modules are dissected providing a framework to disentangle cancer cell's genome functional  
95 reorganization.

## 96 **Results and Discussion**

### 97 **Distant CpGs co-methylate in colon cancer samples**

98 We retrieved DNA methylation data as measured by Infinium HumanMethylation450 Array  $\beta$   
99 values from 90 tumor and 90 adjacent normal tissues from the Colonomics cohort (Closa et  
100 al., 2014; Cordero et al., 2014; Sanz-Pamplona et al., 2015; Sole et al., 2014) to feed the co-  
101 methylation analysis (Figure 1). Quality check consisted in three steps (Table S1). First, we  
102 excluded probes non uniquely mapping to a genomic location, being polymorphic or located  
103 in sex chromosomes (Price et al., 2013). Second, probes with low variability (standard  
104 deviation  $s_{\beta} < 0.05$ ) were filtered out to get rid of correlations led by outliers or presumably  
105 non significant. Finally, probes with missing data in any sample were eliminated (Table S1).  
106 No detectable batch effects were found (Figure S1). Next we sequentially calculated the bulk  
107 pairwise Spearman's correlations between any possible pair of probes adjusting for multiple  
108 testing (Table S2).

109 Co-methylations were detectable even at long distances (Figure 2A) and did not depend on  
110 local probe density (Figure S2A). Correlation coefficients  $\rho$  (a measure of association ranging  
111 from -1 to 1, in which 0 means full independence) were bell-shape distributed, thus indicating  
112 that the majority of correlations lied on the non-significant range, as expected (Figure 2),  
113 independently of the CpG location in open or closed chromatin compartments (Figure S3).  
114 The  $\rho$  distribution was not centered to 0 but shifted towards positive values, thus indicating a

115 trend towards co-methylation changes. That is, the detected changes in DNA methylation  
116 correspond to either the increase or decrease of the scrutinized CpGs altogether, and not in  
117 opposite directions (e.g. inverse associations). The trend to co-methylate was noticeably  
118 increased in cis, being close CpGs' distribution negatively skewed: co-methylations were  
119 enriched at short distances, whereas anti-methylations (negative correlations) were not (Figure  
120 2A).

121 To underpin the biological relevance of the findings and rule out the co-methylation structure  
122 arising due to technical noise, we evaluated five possible sources of artifacts: multiple testing,  
123 batch effects, leading outliers, tumor purity and chip design (see Supplemental Methods) and  
124 none of them appeared to have a significant effect on the results.

125 To account for the iterative nature of the analysis, consisting in exhaustively computing any  
126 pairwise correlation between the Infinium probes with variable DNA methylation, we set an  
127 astringent effect size cut-off of the Spearman's correlation coefficient  $\rho \geq 0.8$ , which is close  
128 to the conservative Bonferroni p-adjustment for the datasets used (optimization against the  
129 asymptotic p-values as calculated by the Fisher Z transform, Table S2) (Fisher, 1915;  
130 Shakhbazov et al., 2016). The absence of notorious clustering of DNA methylation values  
131 (Figure S1) indicates that batch effects are unlikely drivers of co-methylation (Leek et al.,  
132 2010). To attenuate the leading effect of DNA methylation outliers we filtered in probes with  
133 sufficient variation in DNA methylation (setting a standard deviation threshold). To reinforce  
134 this, nonparametric Spearman correlations were run, which rely on DNA methylation ranks  
135 rather than values and are therefore more resistant to outliers (Croux and Dehon, 2010). As  
136 for the Infinium array design, neither the probes GC content (Figure S4) nor the dye channel  
137 (Figure S5) drove the correlations structure; probes mapping to multiple locations or  
138 overlapping to SNPs were filtered out (Price et al., 2013).

### 139 **Anatomy of the co-methylating network in colorectal cancers**

140 We selected the top-scoring correlations ( $\rho \geq 0.8$ ) and assembled a network in which loci and  
141 correlations are represented by nodes (vertex) and links (edges) (Figure 1B). For the sake of  
142 simplicity, we only considered edges with positive correlations. The Colonomics tumor series  
143 network resulted in 63,130 nodes and 26 million connections (Table S3). The distribution of  
144 each CpG degree (amount of connectivity, number of co-methylating neighbors) showed a  
145 heavy-tail shape with the vast majority of nodes being linked to few counterparts, whereas a  
146 few nodes displayed a fairly abundant connectivity (Figure S6). The degree distribution did

147 not resemble power-law, lognormal nor exponential (goodness of fit, Kolmogorov Smirnov  
148 tests,  $p \geq 0.05$ ; Figure S7), as there was not linear dependency between the cumulative  
149 frequencies and the connectivities, as in other biological quantities spanning several orders of  
150 magnitude and heavily skewed to the right (Newman, 2005). This structure was unaffected by  
151 loci features such as chromatin state (Figure S8) and genomic category (Figure S9); but lost  
152 when filtering out trans interactions, as probes placed at any distance in cis showed power-law  
153 compatible distributions (Figure S10). Interestingly, the 99th percentile of the most connected  
154 trans-comethylators presented homogeneous intermediate DNA methylation levels in normal  
155 samples (Figures S11 and S12), with an important enrichment of imprinted loci ( $n=53$ , 11%).  
156 Interestingly, partially methylated domains (PMDs) have been reported as loci with  
157 intermediate DNA methylation values and high variability (Lister et al., 2009), which is  
158 consistent to the top connected co-methylated probes; however, we did not find an enrichment  
159 in them: 27% (132 CpGs) of the rich probes overlapped PMDs, similarly to the 33% (21,065  
160 CpGs) of the probes with at least a significant co-methylation and what is expected from the  
161 background of the whole set of Infinium probes, with an overlap of the 31% (147,257 CpGs).  
162 To test the reproducibility of the network, the analysis was repeated using an independent  
163 dataset, the COAD cohort from TCGA, consisting of 256 primary colon adenocarcinomas. In  
164 TCGA dataset, the DNA methylation  $\beta$  value calling procedure differs from Colonomics', and  
165 therefore reduces the chance of covariation artifacts arising due to the data processing bias.  
166 No batch effects were detected (Figure S1).

167 Near a quarter million probes fulfilled the variability criteria in TCGA colon tumors (Tables  
168 S6 and S7). The overall correlations distribution and the co-methylation decay with distance  
169 matched that of Colonomics' (Figure 2A and Figure S2B). Next we evaluated whether the  
170 correlation value for each pair of probes was conserved, including the non-significant pairs.  
171 To do so, we computed exhaustive pairwise correlations of CpGs located at the chromosome  
172 10 against itself and plotted the Colonomics'  $\rho$  values of each CpG pair against TCGA's. The  
173 linearity of both landscapes (Figure 2B) indicated a high concordance of the overall co-  
174 methylation levels.

175 In a similar vein and to compare the structure of both networks, we checked whether the  
176 correlating nodes present in both cohorts displayed the same connectivity to other nodes. The  
177 influence score of each node (e.g. based in the number of links arising from it) was estimated  
178 using the PageRank score (Page et al., 1999) in both datasets. Both Colonomics and TCGA

179 tumor co-methylation datasets showed a reproducible distribution of nodes' PageRanks  
180 mostly composed by lowly influential CpGs (Figure S13).

181 Next, we modeled the results as a network keeping the  $\rho$  cut-off at 0.8 even though the  
182 multiple testing adjusted significance cut-off at TCGA cohort admitted lowering it due to the  
183 larger sample size (Table S2). The network comprised 37 thousand nodes and around eight  
184 million edges (Table S3). As in the Colonomics cohort, the TCGA network degree  
185 distribution showed a long tail, indicating vast differences in connectedness (Figures S6 and  
186 S7).

### 187 **Coalescent embedding of normal co-methylation networks in the tumor** 188 **networks**

189 We wondered whether some of the co-methylations found in cancers were already detectable  
190 in adjacent normal colonic mucosa, and to which extent the co-methylome structure differed  
191 from the tumor's one. The normal colon co-methylome network was built using 90 non-tumor  
192 tissues from the Colonomics cohort. Given the equivalent sample sizes, we maintained the  $\rho$   
193 cutoff unaltered (Table S2). We found that both the number of probes fulfilling the variance  
194 prerequisite ( $n=99,346$ ) and the number of total correlations ( $7,430,741$ ) decreased to 39%  
195 and 22% of the tumor's ones, respectively. This result was consistent with the higher DNA  
196 methylation variability in tumors. As expected, a predominance of positive correlations was  
197 observed, being more intense for close probes (Figure 2A). Strikingly, negative correlations  
198 (cut-off  $\rho < -0.8$ ) showed a  $>1,000$ -fold reduction and dropped from 7.6 million in tumor to  
199 less than 7 thousands in normal tissue (Table S7). In agreement with the associations found in  
200 tumors, co-methylations were underrepresented in active promoters (Table S8, Figure S14)  
201 and the co-methylation network's connectivities were not power-law distributed (Figures S6  
202 and S7). Probes pairs correlation values showed partial agreement between the normal and  
203 tumor datasets (Figure 2B), with differences being more conspicuous at the node influence  
204 level, pointing to changes in network connectivity (Figure S13).

205 We repeated the analysis with TCGA normal colon samples. It should be noted that this  
206 dataset only includes 38 normal samples (Table S2), and as the correlation significance  
207 depends on the sample size (Fisher, 1915), keeping the same cut-offs is likely to boost the  
208 number of false positives. On the other hand, increasing the  $\rho$  cut-off to an equivalent  
209 detection threshold ( $\rho = 0.96$ , Table S2) produced a very small network whose properties  
210 might be out of scale with the previous analysis. With this cautionary note in mind, keeping



211 the  $\rho = 0.8$  cut-off the network confirmed the distinctive distribution of pairwise correlations  
212 (Figure S4 and Table S9), whose differences are especially conspicuous at short ranges  
213 (Figure 2A) and, importantly, in nodes connectivity.

## 214 **Co-methylating networks display a modular structure in normal and tumor** 215 **tissue**

216 Colonomics tumor network had two noticeable giant components (Figure 3), that were not  
217 present in the normal tissue, indicating a major restructuration of co-methylation architecture  
218 associated with malignant transformation, as we will discuss below. TCGA tumor and normal  
219 co-methylation networks replicated Colonomics overall networks structure (Figure 3).

220 In order to dig into the network preferential attachment, we explored whether the network had  
221 highly connected subnetworks (also known as modules or communities). Modules consist of  
222 clusters of nodes heavily interconnected as compared to the rest of the network (Fortunato,  
223 2010; Newman and Girvan, 2004). Modularity is quantified as the fraction of edges  
224 connecting nodes of the same type minus what it is expected in a randomly wired network.  
225 Scores of 0 indicate no modularity and networks with modular structure typically range from  
226 0.3 to 0.7 (Newman and Girvan, 2004). The tumor co-methylation network was found to be  
227 modular (modularity = 0.47) (Table S3), and using the Clauset's fast greedy method (Clauset  
228 et al., 2004) we partitioned it into 3,270 modules ranging from two to 18,727 nodes.

229 Interestingly, the normal tissue network exhibited a higher co-methylome modularity (0.62)  
230 (Table S3) and network segmentation resulted in 1,265 modules ranging from two to 17,758  
231 nodes. The co-methylation modules retained tight correlation structure after subtracting purity  
232 effects (Zheng et al., 2017) (Figure S16).

233 The vast majority of the small modules were, in fact, composed by sets of probes located at  
234 close distance from each other (e.g. at CpG islands), so we discarded them and focused in  
235 transchromosomal modules, with at least 10 members and located at least 1 Mbp apart or  
236 placed in different chromosomes. The number of transchromosomal modules was 32 (1%) in  
237 the tumor cohort and 18 (1.4%) in the normal cohort (Tables S4 and S5).

238 In agreement with Colonomics's results, TCGA tumor co-methylation network was also  
239 modular (modularity score 0.41) (Table S3) and segmentation produced 3,421 modules  
240 ranging from two to 8,981 nodes. The application of size and co-location filters reduced the  
241 number of transchromosomal modules to 35.

242 Next, we evaluated the degree of conservation of the whole network partitioning into modules  
243 across the four datasets using the adjusted Rand statistic. In this test, the distance measure can  
244 be interpreted as a probability, being zero when the congruence is expected by chance and one  
245 when the matching is perfect. It should be noted that the Rand statistic renders negative values  
246 when finding anti-associations (Hubert and Arabie, 1985). Networks clustering on adjusted  
247 Rand's distance indicates that modules memberships separate tumor's from normal's  
248 networks in both datasets (Figure S15A), in line with the similarities in nodes population  
249 (Figure S15B), and their spatial co-methylation patterns (Figure S2B). Overall conservation  
250 of co-methylomes structure and connectivity as well as the differences between normal and  
251 tumor samples was noticeable by visual inspection (Figures 3, S17 and S18). It is worth  
252 noting that the use of a correlation threshold (i.e. effect size  $\rho \geq 0.8$ ) may underestimate  
253 module co-methylation maintenance when the correlations distribution gets displaced towards  
254 values below, but close to, the statistical significance cut-off (Appendix 1, Figure S18).

255 Module preservation across tissue types and cohorts was also evaluated by cross-tabulation of  
256 the number of shared CpGs (Table S10). Twelve Colonomics tumor modules had one or more  
257 counterparts in the normal tissue network, and a similar number in TCGA tumor cohort  
258 (Fisher's exact test,  $p < 0.0001$ ) (Tables S10, S11). Strikingly, the five-top sized Colonomics  
259 tumor modules partially matched to multiple TCGA's modules (Table S11). This result is in  
260 concordance with the resolution limit of modularity-optimizing module detecting algorithms,  
261 which tend to aggregate modules into few giant components, disregarding their inner  
262 complexity (Fortunato and Barthelemy, 2007).

### 263 **Co-methylating module membership evinces functional signatures**

264 To test the hypothesis that co-methylation structures are directly related with functional  
265 properties we investigated genomic and functional features of co-methylated CpGs. It should  
266 be noted that a large subset of HumanMethylation450k probes are located in promoters and  
267 promoter-related features. Thus, the specific design of the HumanMethylation450k array may  
268 introduce biases as it oversamples TSS-related features, in which clusters of probes are  
269 located, and disregards other genomic compartments (Bibikova et al., 2011; Sandoval et al.,  
270 2011; Silva-Martinez et al., 2017). Moreover, coordinated co-methylation is expected among  
271 neighboring CpGs within each one of these genomic elements (Barrera and Peinado, 2012;  
272 Gaidatzis et al., 2014; Kim et al., 2008; Libertini et al., 2016; MacDonald et al., 2015; Wang

273 et al., 2016). Therefore, enrichment analysis for genomic features and compartments were  
274 corrected according to the HumanMethylation450k array background.

275 The tumor modules displayed important differences in feature enrichment, including  
276 chromatin states, genomic categories, CpG islands and association with known motifs (Figure  
277 S19 and Appendix 1). In line with the weighted gene co-expression network analysis, in  
278 which functional signatures can be told apart by mining gene co-expression (Horvath et al.,  
279 2012), the module-specific co-regulation patterns denoted by distinctive abundance of  
280 genomic and functional states (Figure S19; Appendix 1) of co-methylation modules pointed  
281 out the existence of a latent structure. Among the multiple features analyzed, a striking global  
282 enrichment of inactive promoters was observed in a large number of modules (Figure S20),  
283 pointing out potential clusters of co-regulated genes.

284 Next, we explored the overlapping of the co-methylation modules with regions of DNA  
285 methylation variability previously reported in colon cancer (Hansen et al., 2011).  
286 Interestingly, seven out of 32 Colonomics tumor modules significantly overlies tumor  
287 hypermethylated blocks (Figures S21 and S22 and Table S12). Regarding other types of DNA  
288 methylation variability reported by Hansen, modules showed distinctive profiles, with  
289 frequent enrichment in boundary shifts as well in loss of regulation; novel hypomethylation  
290 blocks were enriched in three modules only. This complexity reinforces the individuality of  
291 co-methylation modules, suggesting that they might reflect different mechanisms.

292 A comprehensive summary of structural and functional feature enrichment for each co-  
293 methylation module is shown in Appendix 1 with the top associations listed in Table S13). To  
294 name a few examples, multiple co-methylation modules were significantly enriched for  
295 Polycomb-related marks (i.e. H3K27ME3, or SUZ12, EED and PRC2 targets; e.g. tumor  
296 modules 1, 3, 5 and 598); for frequently mutated at COSMIC molecular signatures (i.e. tumor  
297 modules 2, 4 and 8); and for gene expression (i.e. tumor module 8). Finally, we could also  
298 confirm that co-methylation network associated features found in TCGA matched  
299 Colonomics enrichment signatures, e.g., the underrepresentation of co-methylations within  
300 active promoters (Figure S14).

301 To shed light into causal factors driving dynamic methylome modularity we searched for  
302 enriched motifs (i.e. transcription factor binding sites) at the co-methylating loci  
303 (Supplementary methods). We found that six out of the 32 Colonomics tumor modules  
304 presented one or more significantly enriched motifs (Table S14). Enriched motifs included

305 ETS and RUNX families (modules 1, 3, 327), FOS family members (Fra1, Atf3, BATF,  
306 Fosl2, AP-1, Jun-AP1; modules 2 and 4), FOXA1-related (FOXA1, HNF4a, FOXMA;  
307 module 2), GC box (KLF5 and KLF4; module 2), C/EBP (module 3), PAX7 and MYF5  
308 (module 5), homeobox (modules 5, 83), MADS (module 152), ASCL1 (module 598)  
309 (Appendix 1).

310 In summary, the functional signatures of DNA co-methylation modular architecture evince  
311 the putative mediators of epigenetic remodeling and signaling reprogramming in colorectal  
312 cancer. We postulate that coordinated DNA methylation changes at interspersed sites (here  
313 identified as belonging to the same module) regulate signaling pathways and biological  
314 functions. This hypothesis is supported by recent studies demonstrating the DNA methylation  
315 mediated binding of transcription factors to specific sites with a direct impact in gene  
316 regulation (Kribelbauer et al., 2017; Yin et al., 2017).

### 317 **Modeling of module's DNA methylation variation allows categorization and** 318 **study of feature associations in new samples**

319 As shown above, modules depict shared patterns of co-methylations (network edges) which  
320 emerge from structured DNA methylation levels among loci (network nodes). To dissect the  
321 latter, we applied a samples stratification procedure based on the DNA methylation status of  
322 their CpGs (Supplemental methods) that results in the partition of each module into two to  
323 three DNA methylation profiles (Figure S23). The putative effects of tumor purity to DNA  
324 methylation levels were identified and subtracted (Figure S24).

325 This methodology provides with a powerful tool to explore potential correlates of DNA  
326 methylation profiles with molecular and biological features, including clinical data, and  
327 importantly, enabling the model to classify new samples and to make predictions without  
328 computing new correlations. An in-depth exploitation of this approach is beyond the scope of  
329 this paper, but as a proof of concept, we evaluated whether module cluster membership  
330 conveyed gene expression signatures to tumor samples. The pairwise differential expression  
331 between samples belonging to different module clusters was computed (adjusted  $p < 0.1$  cut-  
332 off, Figure S25) in both cohorts of colon tumors. TCGA cohort consistently exhibited a higher  
333 number of differentially expressed genes. This result may be explained by the larger size of  
334 this series and the use of RNA-Seq, that has more sensitivity than the microarrays (Zhao et  
335 al., 2014) applied in the Colonomics. Nevertheless, the overall gene over- and down-  
336 expression trends were maintained across cohorts (Figure S26). The top 50 significant

337 differentially expressed genes in both cohorts are listed in Appendix 2 for each one of the 32  
338 Colonomics tumor modules.

### 339 **Dynamics of co-methylation modules reveals epigenetic rewiring of defined** 340 **genomic compartments in cancer**

341 As noted above, the tumor co-methylation network displayed a striking disjoint structure  
342 visualized as two giant compartments (Figure 3). The emerging large compartment, not  
343 present in normal tissue, spanned multiple modules (Figure 3 and Figure S27) and was  
344 funneled by DNA methylation negative correlations between modules (Figure 4A). The  
345 coordinated inversion of DNA methylation variation affected hundreds or even thousands of  
346 sites throughout the whole genome (Figure 4B). The pervasive nature of anticorrelations  
347 overcame age, gender, tumor stage and anatomical site potential effects on modules' DNA  
348 methylation variation (Figure S28A). Loci with copy number alterations also conveyed the  
349 module-specific DNA methylation ranks mimicking the profiles along balanced regions  
350 (Figure S28B).

351 To further dissect the co-methylation dynamics we analyzed the modules preservation  
352 between normal and tumor. Significant equivalences were found for most modules (Figure  
353 S29): normal modules N2 and N3 largely overlapped with tumor modules T1 and T2  
354 respectively (Figure S29), which suggests the preservation of module's structure and co-  
355 methylation links. A large overlap of associated genes among modules was also observed  
356 (Figure S29C). At the functional level, the preserved modules showed specific enrichments.  
357 For instance, normal module N2 intersection with tumor module T1 ( $N2 \cap T1$ ) showed  
358 enrichment for RNA transcription and metabolic processes and DNA binding functions  
359 (Figure S30) and a high proportion of probes were located in CpG islands (77%) with a clear  
360 trend towards tumor hypermethylation (Figure 5B, Figure S31).

361 Next we analyzed the dynamics of CpG sites between normal and tumor modules. For the  
362 sake of simplicity only probes in the four largest modules in the Colonomics normal and  
363 tumor series were considered for differential module membership. A particular case was the  
364 scattering of normal module N1 probes into different tumor modules (Figure 5A), including  
365 the hijacking of several hundreds of sites by modules with inverse correlations, e.g.: tumor  
366 modules T1 and T2 (Figure S27). The subsets of probes flowing from the normal module N1  
367 to each one of the tumor modules (intersections between normal module N1 and the tumor  
368 modules T1 to T4) were associated to subsets of genes with limited overlap (Figure 5C) and

369 displayed distinctive genomic features in regard to gene regulation:  $N1 \cap T1$  members were  
370 enriched in CpG islands, while  $N1 \cap T2$  were depleted and  $N1 \cap T3$  were frequently near the  
371 TSS (Figure 5D). The tumor-normal DNA methylation signatures were in concordance with  
372 the preferential genomic location of probes: members of the intersection  $N1 \cap T1$  were  
373 characterized by the prevalence of hypermethylations in the tumor, while the rest showed a  
374 clear trend towards hypomethylation (Figure 5E and Figure S31).

375 As a whole, our analysis points out an overall preservation of co-methylation modules in the  
376 normal-tumor transformation concomitantly with an important dispersal of subsets of sites  
377 with distinctive features into tumor modules. The tumor redefined modular landscape appears  
378 to have biological insights: the subsets of sites flowing from one module to another (denoted  
379 here as normal-tumor module intersections) display differential enrichments in functional and  
380 biological processes involved in cancer transformation (Figure 5E and Appendix 2). Some of  
381 the affected signaling pathways, including polycomb regulation, chromatin binding and genes  
382 defining epithelial-mesenchymal transition appear as the usual suspects contributing to the  
383 epigenetic reshaping of genomic compartments and the functional reprogramming of cancer  
384 cells (Appendix 2).

### 385 **Surfing the co-methylating networks pinpoints functional sites**

386 Beyond the remarkable functional and structural features of co-methylation modules revealed  
387 by this analysis, it has not escaped our attention that the stored data provide an excellent  
388 resource to carry out an insightful tracing of individual correlations. A detailed analysis of the  
389 data at this level is beyond the scope of this paper, but as a simple shortcut to navigate the co-  
390 methylating network and their associated functional features we developed a web tool “*corre*”  
391 (available at <http://maplab.cat/corre>). To illustrate the discovery potential of this tool we  
392 queried the *INHBB* gene encoding activin B, a member of the TGF-beta family, with different  
393 biological activities, including a role in cell proliferation and inflammation. Epigenetic  
394 silencing of *INHBB* is frequent in colorectal cancer (Frigola et al., 2006) and has been  
395 proposed as indicator of poor outcome (Mayor et al., 2009). The co-methylation landscape of  
396 *INHBB* exposed by the *Corre* tool showed a large number of positive correlations 20kb  
397 upstream and downstream of the gene in both normal and tumor samples (Figure 6). Negative  
398 correlations were only present in tumors and were enriched in poised promoters, indicating  
399 the potential remodeling of bivalent states and hypermethylation (McGarvey et al., 2008;  
400 Ohm et al., 2007; Rodriguez et al., 2008). Compared with the normal samples, the tumors

401 displayed an increase in the number of links for most sites, although some chromosomes,  
402 especially 8 (Figure 6E), but also 13, 14, 17 and 21, showed an opposite trend with a  
403 depletion of co-methylations in the tumors as compared with the normal samples (Figure  
404 S32). Another interesting result was in regard to cg03699182 probe (Figure 6D, arrowhead)  
405 located in the CpG island of the INHBB promoter presented 42 co-methylations ( $\rho > 0.8$ ) in  
406 the normal samples against only three in the tumors. Most of the cg03699182 co-methylations  
407 affected were located in poised promoters of polycomb regulated genes (Figure S32). The  
408 dynamics of the connections and the properties of the affected sites are consistent with the  
409 participation of instructive mechanisms resulting in the DNA hypermethylation and long  
410 range epigenetic silencing of multiple genes in colorectal cancer (Frigola et al., 2006; Keshet  
411 et al., 2006; Michieletto et al., 2018).

## 412 **Final considerations**

413 Dissection of DNA methylation encoded information offers a far-reaching gamut of insights  
414 into genome biology (Jones, 2012; Schubeler, 2015 ), including the inference of genome  
415 architecture as demonstrated by recent studies (Fortin and Hansen, 2015; Jenkinson et al.,  
416 2017; Jorda et al., 2017; Raineri et al., 2018; Zhang et al., 2017). As a new inquiry, here we  
417 report a novel and robust analysis of coordinated DNA methylation dynamics in non-  
418 contiguous CpGs in two cohorts of colon normal and cancer tissues. This application provides  
419 a reproducible and synthetic network representation of cell's epigenome meta-structure and  
420 unveils modules or genomic territories of highly connected loci. The co-methylation modules  
421 comprise regions displaying common structural and functional features pointing out putative  
422 drivers of variability. Despite wide overlapping between normal and tumor tissue networks,  
423 striking differences in connectivity reveal specific patterns of functional rewiring and convey  
424 gene expression signatures with a potential impact on cancer cell biology.

425 Our data present a remodeled epigenetic landscape of colon cancer cells outlined by  
426 coordinated DNA methylation variations superseding the stochastic nature of DNA  
427 methylation dynamics (Jenkinson et al., 2017; Landan et al., 2012; Pujadas and Feinberg,  
428 2012). The model can be visualized by a scrambled Rubik's cube resulting from just of a few  
429 flips (Figure S33A). In our case, cube's pieces correspond to the set of loci with coordinated  
430 methylation, and the axes would be the mechanisms flipping one or more modules (Figure  
431 S33B). This metaphor has two important corollaries with the corresponding epigenetic  
432 representations:

- 433       • Pieces linked by connectors move together, which implies that any specific scrambled  
434 conformation is the result of specific flips. Moreover, not all the arrangements are  
435 possible unless the cube is disassembled and reassembled. Similarly, cancer cell  
436 methylome dynamics is determined by sequential activation/inactivation of a limited  
437 number of mechanisms affecting genomic regulation. Interestingly, chromosomal  
438 rearrangements would provide an additional level of reshuffling that would be  
439 equivalent to reassembling Rubik's cube.
- 440       • The scrambled cube may be solved by predictable flips that do not imply the reversal  
441 of the flips that generated it. Currently we can only speculate, but this means that  
442 knowing the mechanisms governing epigenetic programs, it would be possible to  
443 design a strategy to reconstruct a "normal" epigenome by just turning on/off the  
444 appropriate switches and in the right sequence.

445 Summing up, our approach aims to offer a contextual view of the cancer epigenetic landscape  
446 to better define their nature and their eventual impact on the disease. The use of DNA co-  
447 methylation architecture to portrait the complex genome regulation scenario aims to provide a  
448 feasible surrogate marker that can be easily assessed in prospective clinical settings (e.g.  
449 response to treatment).

## 450 **Materials and methods**

451 Two colon cancer datasets were used. Colonomics (<http://www.colonomics.org>) series  
452 included 90 paired primary tumors (stage IIA and IIB) and their adjacent normal tissue. Of the  
453 90 patients, 67 were males and 23 females, aged 43-86 years (mean: 70.37), and 20 developed  
454 metastasis. All tumors were microsatellite-stable. Samples were evaluated for DNA  
455 methylation (Illumina Infinium HumanMethylation450 BeadChip Array), gene expression  
456 (Affymetrix Human Genome U219), and somatic mutations (exome sequencing) (Closa et al.,  
457 2014; Cordero et al., 2014; Sanz-Pamplona et al., 2015; Sole et al., 2014).

458 The Cancer Genome Atlas (TCGA) series was composed by 256 primary tumor and 38  
459 adjacent non-tumor samples from the colon adenocarcinoma (COAD) cohort (Zhu et al.,  
460 2014). Patients were aged 31 to 90 years at diagnosis (mean 65.61), and included 141 males,  
461 144 females and one unassigned. Pathologic stages included Stage I (40), Stage II (97), Stage  
462 III (75), Stage IV (32); 11 were not available or discrepant. Regarding microsatellite  
463 instability, 10 were positive, 65 negative and 181 were either not tested or had an unknown



464 status. Samples readouts included DNA methylation by Illumina Infinium Array, gene  
465 expression by RNA-Seq counts and somatic mutations by exome sequencing.

466 A scheme summarizing data processing and workflow is depicted in figure 1. Briefly, DNA  
467 methylation beta values were subjected to serial pairwise correlation analysis for the  
468 Colonomics tumor (primary dataset) and normal adjacent tissue, as well and both the TCGA  
469 normal samples and tumors (external datasets). Strong associations (effect size Spearman's  $\rho$   
470  $\geq 0.8$ ) were stored. Co-methylation networks were built upon the correlations data using  
471 previously described approaches (Clauset et al., 2009; Csardi and Nepusz, 2006; Cullen and  
472 Frey, 1999; Delignette-Muller and Dutang, 2015; Gillespie, 2014; Saha et al., 2017; Zhang  
473 and Horvath, 2005), from which highly connected modules according to the fast greedy  
474 community detection algorithm were isolated (Clauset et al., 2004; Csardi and Nepusz, 2006).  
475 Module members were further classified into major DNA methylation clusters using kNN  
476 (Venables and Ripley, 2002) taking into account not only the co-methylation but the purity-  
477 corrected DNA methylation status (Aran et al., 2015; Zheng et al., 2017) of their members  
478 (i.e. consistently lowly or highly methylated) (Chang et al., 2010; Wang et al., 2007). Next,  
479 modules and/or profiles were functionally annotated according to public datasets (Aryee et al.,  
480 2014; Fortin and Hansen, 2015; Hansen et al., 2011; Lister et al., 2009), molecular features  
481 databases (Heinz et al., 2010; Liberzon et al., 2011) and expression signatures (Gel et al.,  
482 2016; Love et al., 2014; Quinlan and Hall, 2010; Smyth, 2005). Modules characterization,  
483 including reproducibility assessment, consisted in mutual profiles comparison and differential  
484 expression analysis among different cohorts (Akdemir and Chin, 2015; Hubert and Arabie,  
485 1985; Krzywinski et al., 2009; Langfelder et al., 2011; Shannon et al., 2003).

486 A Web application "Corre" has been implemented to facilitate browsing the DNA co-  
487 methylation events of investigator's favorite locus or gene in the both the Colonomics and  
488 TCGA COAD datasets. The tool allows candidate queries either by gene symbol or Illumina  
489 Infinium probename, providing the annotated co-methylations full list. Apart of downloadable  
490 spreadsheets, Corre renders interactive plots to evaluate zonal (chromosome) and functional  
491 (chromatin color) enrichments (Conway et al., 2016; Ernst et al., 2011; Gesmann and de  
492 Castillo, 2011; Zhang et al., 2013). Source code is available at  
493 <https://bitbucket.org/imallona/corre> under the GPL terms. Corre can be accessed freely and  
494 without registration at <http://www.maplab.cat/corre>.

495 Extended methods are available in supplementary material.

## 496 **Acknowledgements**

497 We thank Iñaki Martínez de Ilarduya for his excellent technical support and Francisco Chen  
498 for help parallelizing the sequential correlations. The data presented here are in part based  
499 upon data generated by the TCGA Research Network: <http://cancergenome.nih.gov/>.

## 500 **Declarations**

### 501 **Authors' contributions**

502 IM, VM and MAP conceived the study. IM developed the method and wrote the software.  
503 IM, SA, ADV and VM analyzed data. IM and MAP wrote the manuscript. All authors read  
504 and approved the manuscript.

### 505 **Samples, Ethics approval and consent to participate**

506 Colonomics samples were collected at the Bellvitge Hospital. The Clinical Research Ethics  
507 Committee (CEIC) of the Bellvitge Hospital approved the study protocol, and all individuals  
508 provided written informed consent to participate and for genetic analyses to be done on their  
509 samples. The approval number is PR178/11. Additional information about the study and  
510 patient samples can be found at <http://www.colonomics.org>. TCGA data were obtained at  
511 <http://cancergenome.nih.gov/>.

### 512 **Availability of data and material**

513 The code is available at: <https://bitbucket.org/imallona/correlations> under the GPL v3 terms.  
514 The *Corre* Web tool can be freely accessed at <http://maplab.cat/corre>; its source code is  
515 available at <https://bitbucket.org/imallona/corre> under the GPL v3 terms. Colomics data may  
516 be accessed at <http://colonomics.org>. TCGA data were obtained at  
517 <http://cancergenome.nih.gov/>.

### 518 **Competing interests**

519 MAP is cofounder and equity holder of Aniling, a biotech company with no interests in this  
520 paper. The rest of the authors declare no conflict of interest.

521 **Funding**

522 This work was funded by the Spanish Ministry of Science, Innovation and Universities  
523 (FEDER, SAF2015-64521-R to MAP), the Agency for Management of University and  
524 Research Grants (AGAUR) of the Catalan Government grants 2017SGR723 and  
525 2017SGR529. The funding agency had no role in the design of the study, collection, analysis,  
526 interpretation of data nor manuscript writing.

527

## 528 **Figure Legends**

529 **Figure 1.** Co-methylation analysis framework. **A**, CpGs co-methylation occurs at close (cis)  
530 and long distances (trans). **B**, DNA co-methylation networks display a modular structure in  
531 normal and tumor samples. **C**, Co-methylation modules display differential genomic and  
532 functional signatures. **D**, Analysis of normal-tumor co-methylation dynamics points out  
533 cancer pathways and mechanisms.

534 **Figure 2.** **A**, Correlation distribution in normal and tumor samples among probes located in  
535 chromosome 10. The bell-shaped distribution and shifted towards positive values at the tumor  
536 cohort (whole chromosome 10); the trend to co-methylate is noticeably increased in cis (chr10  
537 probes located at less than 10 kbp). Red: negative correlations ( $\rho < -0.5$ ); green: positive  
538 correlations ( $\rho \geq 0.5$ ). **B**, Correlations replication across cohorts. For each cohort, a pairwise  
539 correlation analysis was conducted for any probe with  $sd \geq 0.05$ . The correlation coefficient  
540 rho (X and Y axes) for each probe pair was plotted to check whether the co-methylation  
541 landscape was reproduced. Analysis was restricted to chromosome 10 Infinium450K probes.

542 **Figure 3.** Modular structure of colorectal tumor and normal tissue co-methylation networks.  
543 The networks were built independently for each dataset, but the nodes (CpGs) are colored  
544 using the Colonomics Tumor module membership. Nodes with no cross-representation are  
545 shown in black. Graphs are limited to a random sample of 5,000 nodes and solitary nodes are  
546 not plotted; network layout was calculated by  $1 - \rho$  (edges) weighted springs.

547 **Figure 4.** The two largest tumor modules show opposed DNA methylation dynamics. **A**,  
548 Correlation of three randomly picked CpGs from modules 1 and 2 in 92 Colonomics tumor  
549 samples. **B**, DNA methylation ranks of modules 1 and 2 in four Colonomics tumor samples.  
550 Patients labeled with color codes as depicted in panel A.

551 **Figure 5.** **A**, Sankey diagram depicting balanced probes overlap between normal and tumor  
552 modules in the Colonomics datasets. Only intersections with  $>300$  probes are annotated, and  
553 the number of associated genes is indicated. **B**, Distribution of probes according to the mean  
554 DNA methylation values in normal tissue (Y-axis) against the tumor-normal delta value (X-  
555 axis). Only probes overlapping in normal and tumor modules (intersections) are represented.  
556 A decomposed version of this figure is shown in Figure S31. **C**, Circos representation of  
557 modules associated genes overlap (purple connectors) and enriched terms sharing (blue  
558 connectors). **D**, Genomic context enrichment of normal module 1 intersections with tumor

559 modules. **E**, Gene set functional enrichment of normal module 1 intersections with the four  
560 largest tumor modules.

561 **Figure 6:** Illustrative example of the *Corre* web tool usage. This application queries a user  
562 selected Infinium array probe (i.e.: cg25924274) or a set of gene associated probes (i.e.:  
563 *INHBB*) and renders graphs displaying the feature distribution of the anchor (preselected site)  
564 and correlating CpGs, including DNA methylation levels, genomic element category, HMM  
565 chromatin states, etc. In addition, tables containing genetic and functional information on the  
566 correlating sites may be downloaded for further analysis. **A**, UCSC genome browser  
567 representation of the region encompassing the preselected *INHBB* gene. **B**, The tool renders  
568 graphs showing relevant features (see legends) for each one of the gene associated probes  
569 (anchor CpGs). **C**, Distribution of DNA methylation levels in anchor CpGs and the  
570 correlating sites. **D**, Sum of correlating sites in normal and tumor tissues for each anchor CpG  
571 represented by chromatin state frequency. Positive (+) and negative (-) correlating sites show  
572 distinct chromatin state profiles in the tumors. **E**, Genomic distribution of cg11513884 co-  
573 methylating CpGs located in chromosomes 2 (red), 7 and 8 (blue).

574

575

## 576 **References**

- 577 Akdemir, K. C., and Chin, L. (2015). HiCPlotter integrates genomic data with interaction  
578 matrices. *Genome Biol* 16, 198.
- 579 Akulenko, R., and Helms, V. (2013). DNA co-methylation analysis suggests novel functional  
580 associations between gene pairs in breast cancer samples. *Hum Mol Genet* 22, 3016-3022.
- 581 Aran, D., Sirota, M., and Butte, A. J. (2015). Systematic pan-cancer analysis of tumour purity.  
582 *Nat Commun* 6, 8971.
- 583 Aryee, M. J., Jaffe, A. E., Corrada-Bravo, H., Ladd-Acosta, C., Feinberg, A. P., Hansen, K.  
584 D., and Irizarry, R. A. (2014). Minfi: a flexible and comprehensive Bioconductor package for  
585 the analysis of Infinium DNA methylation microarrays. *Bioinformatics* 30, 1363-1369.
- 586 Barrera, V., and Peinado, M. A. (2012). Evaluation of single CpG sites as proxies of CpG  
587 island methylation states at the genome scale. *Nucleic Acids Res* 40, 11490-11498.
- 588 Bibikova, M., Barnes, B., Tsan, C., Ho, V., Klotzle, B., Le, J. M., Delano, D., Zhang, L.,  
589 Schroth, G. P., Gunderson, K. L., et al. (2011). High density DNA methylation array with  
590 single CpG site resolution. *Genomics* 98, 288-295.
- 591 Clauset, A., Newman, M. E., and Moore, C. (2004). Finding community structure in very  
592 large networks. *Physical review E* 70, 066111.
- 593 Clauset, A., Shalizi, C. R., and Newman, M. E. (2009). Power-law distributions in empirical  
594 data. *SIAM review* 51, 661-703.
- 595 Closa, A., Cordero, D., Sanz-Pamplona, R., Sole, X., Crous-Bou, M., Pare-Brunet, L.,  
596 Berenguer, A., Guino, E., Lopez-Doriga, A., Guardiola, J., et al. (2014). Identification of  
597 candidate susceptibility genes for colorectal cancer through eQTL analysis. *Carcinogenesis*  
598 35, 2039-2046.
- 599 Conway, J., Eddelbuettel, D., Nishiyama, T., Prayaga, S. K., and Tiffin, N. (2016). R interface  
600 to the PostgreSQL database system. R package version 0.4-1.
- 601 Cordero, D., Sole, X., Crous-Bou, M., Sanz-Pamplona, R., Pare-Brunet, L., Guino, E.,  
602 Olivares, D., Berenguer, A., Santos, C., Salazar, R., et al. (2014). Large differences in global  
603 transcriptional regulatory programs of normal and tumor colon cells. *BMC Cancer* 14, 708.
- 604 Creixell, P., Reimand, J., Haider, S., Wu, G., Shibata, T., Vazquez, M., Mustonen, V.,  
605 Gonzalez-Perez, A., Pearson, J., Sander, C., et al. (2015). Pathway and network analysis of  
606 cancer genomes. *Nat Methods* 12, 615-621.
- 607 Croux, C., and Dehon, C. (2010). Influence functions of the Spearman and Kendall  
608 correlation measures. *Statistical methods & applications* 19, 497-515.
- 609 Csardi, G., and Nepusz, T. (2006). The igraph software package for complex network  
610 research. *InterJournal, Complex Systems* 1695.
- 611 Cullen, A. C., and Frey, H. C. (1999). Probabilistic techniques in exposure assessment: a  
612 handbook for dealing with variability and uncertainty in models and inputs.: Springer Science  
613 & Business Media).
- 614 Chang, F., Qiu, W., Zamar, R. H., Lazarus, R., and Wang, X. (2010). Clues: an R package for  
615 nonparametric clustering based on local shrinking. *Journal of Statistical Software* 33, 1-16.
- 616 Chen, J. C., Alvarez, M. J., Talos, F., Dhruv, H., Rieckhof, G. E., Iyer, A., Diefes, K. L.,  
617 Aldape, K., Berens, M., Shen, M. M., and Califano, A. (2014). Identification of causal genetic

- 618 drivers of human disease through systems-level analysis of regulatory networks. *Cell* *159*,  
619 402-414.
- 620 Delignette-Muller, M. L., and Dutang, C. (2015). fitdistrplus: An R package for fitting  
621 distributions. *Journal of Statistical Software* *64*, 1-34.
- 622 Eckhardt, F., Lewin, J., Cortese, R., Rakyan, V. K., Attwood, J., Burger, M., Burton, J., Cox,  
623 T. V., Davies, R., Down, T. A., et al. (2006). DNA methylation profiling of human  
624 chromosomes 6, 20 and 22. *Nat Genet* *38*, 1378-1385.
- 625 Eden, A., Gaudet, F., Waghmare, A., and Jaenisch, R. (2003). Chromosomal instability and  
626 tumors promoted by DNA hypomethylation. *Science* *300*, 455.
- 627 Ernst, J., Kheradpour, P., Mikkelson, T. S., Shores, N., Ward, L. D., Epstein, C. B., Zhang,  
628 X., Wang, L., Issner, R., Coyne, M., et al. (2011). Mapping and analysis of chromatin state  
629 dynamics in nine human cell types. *Nature* *473*, 43-49.
- 630 Feinberg, A. P., Koldobskiy, M. A., and Gondor, A. (2016). Epigenetic modulators, modifiers  
631 and mediators in cancer aetiology and progression. *Nat Rev Genet* *17*, 284-299.
- 632 Fisher, R. A. (1915). Frequency distribution of the values of the correlation coefficient in  
633 samples from an indefinitely large population. *Biometrika* *10*, 507-521.
- 634 Fortin, J. P., and Hansen, K. D. (2015). Reconstructing A/B compartments as revealed by Hi-  
635 C using long-range correlations in epigenetic data. *Genome Biol* *16*, 180.
- 636 Fortunato, S. (2010). Community detection in graphs. *Physics reports* *486*, 75-174.
- 637 Fortunato, S., and Barthelemy, M. (2007). Resolution limit in community detection. *Proc Natl*  
638 *Acad Sci USA* *104*, 36-41.
- 639 Frigola, J., Song, J., Stirzaker, C., Hinshelwood, R. A., Peinado, M. A., and Clark, S. J.  
640 (2006). Epigenetic remodeling in colorectal cancer results in coordinate gene suppression  
641 across an entire chromosome band. *Nat Genet* *38*, 540-549.
- 642 Gaidatzis, D., Burger, L., Murr, R., Lerch, A., Dessus-Babus, S., Schubeler, D., and Stadler,  
643 M. B. (2014). DNA sequence explains seemingly disordered methylation levels in partially  
644 methylated domains of Mammalian genomes. *PLoS Genet* *10*, e1004143.
- 645 Gao, Y., and Teschendorff, A. E. (2017). Epigenetic and genetic deregulation in cancer target  
646 distinct signaling pathway domains. *Nucleic Acids Res* *45*, 583-596.
- 647 Gel, B., Diez-Villanueva, A., Serra, E., Buschbeck, M., Peinado, M. A., and Malinverni, R.  
648 (2016). regioneR: an R/Bioconductor package for the association analysis of genomic regions  
649 based on permutation tests. *Bioinformatics* *32*, 289-291.
- 650 Gesmann, M., and de Castillo, D. (2011). Using the google visualisation api with R. *R Journal*  
651 *30*, 40-44.
- 652 Gillespie, C. S. (2014). Fitting heavy tailed distributions: the powerLaw package. arXiv  
653 preprint arXiv:14073492.
- 654 Hansen, K. D., Timp, W., Bravo, H. C., Sabunciyan, S., Langmead, B., McDonald, O. G.,  
655 Wen, B., Wu, H., Liu, Y., Diep, D., et al. (2011). Increased methylation variation in  
656 epigenetic domains across cancer types. *Nat Genet* *43*, 768-775.
- 657 Heinz, S., Benner, C., Spann, N., Bertolino, E., Lin, Y. C., Laslo, P., Cheng, J. X., Murre, C.,  
658 Singh, H., and Glass, C. K. (2010). Simple combinations of lineage-determining transcription  
659 factors prime cis-regulatory elements required for macrophage and B cell identities. *Mol Cell*  
660 *38*, 576-589.

- 661 Horvath, S., Zhang, Y., Langfelder, P., Kahn, R. S., Boks, M. P., van Eijk, K., van den Berg,  
662 L. H., and Ophoff, R. A. (2012). Aging effects on DNA methylation modules in human brain  
663 and blood tissue. *Genome Biol* 13, R97.
- 664 Hubert, L., and Arabie, P. (1985). Comparing partitions. *Journal of classification* 2, 193-218.
- 665 Jenkinson, G., Pujadas, E., Goutsias, J., and Feinberg, A. P. (2017). Potential energy  
666 landscapes identify the information-theoretic nature of the epigenome. *Nat Genet* 49, 719-  
667 729.
- 668 Jones, P. A. (2012). Functions of DNA methylation: islands, start sites, gene bodies and  
669 beyond. *Nat Rev Genet* 13, 484-492.
- 670 Jorda, M., Diez-Villanueva, A., Mallona, I., Martin, B., Lois, S., Barrera, V., Esteller, M.,  
671 Vavouri, T., and Peinado, M. A. (2017). The epigenetic landscape of Alu repeats delineates  
672 the structural and functional genomic architecture of colon cancer cells. *Genome Res* 27, 118-  
673 132.
- 674 Keshet, I., Schlesinger, Y., Farkash, S., Rand, E., Hecht, M., Segal, E., Pikarski, E., Young,  
675 R. A., Niveleau, A., Cedar, H., and Simon, I. (2006). Evidence for an instructive mechanism  
676 of de novo methylation in cancer cells. *Nat Genet* 38, 149-153.
- 677 Kim, S., Li, M., Paik, H., Nephew, K., Shi, H., Kramer, R., Xu, D., and Huang, T. H. (2008).  
678 Predicting DNA methylation susceptibility using CpG flanking sequences. *Pac Symp*  
679 *Biocomput*, 315-326.
- 680 Kribelbauer, J. F., Laptenko, O., Chen, S., Martini, G. D., Freed-Pastor, W. A., Prives, C.,  
681 Mann, R. S., and Bussemaker, H. J. (2017). Quantitative Analysis of the DNA Methylation  
682 Sensitivity of Transcription Factor Complexes. *Cell Rep* 19, 2383-2395.
- 683 Krzywinski, M., Schein, J., Birol, I., Connors, J., Gascoyne, R., Horsman, D., Jones, S. J., and  
684 Marra, M. A. (2009). Circos: an information aesthetic for comparative genomics. *Genome*  
685 *Res* 19, 1639-1645.
- 686 Landan, G., Cohen, N. M., Mukamel, Z., Bar, A., Molchadsky, A., Brosh, R., Horn-Saban, S.,  
687 Zalcenstein, D. A., Goldfinger, N., Zundeleovich, A., et al. (2012). Epigenetic polymorphism  
688 and the stochastic formation of differentially methylated regions in normal and cancerous  
689 tissues. *Nat Genet* 44, 1207-1214.
- 690 Langfelder, P., Luo, R., Oldham, M. C., and Horvath, S. (2011). Is my network module  
691 preserved and reproducible? *PLoS Comput Biol* 7, e1001057.
- 692 Leek, J. T., Scharpf, R. B., Bravo, H. C., Simcha, D., Langmead, B., Johnson, W. E., Geman,  
693 D., Baggerly, K., and Irizarry, R. A. (2010). Tackling the widespread and critical impact of  
694 batch effects in high-throughput data. *Nat Rev Genet* 11, 733-739.
- 695 Li, Y., Xu, J., Ju, H., Xiao, Y., Chen, H., Lv, J., Shao, T., Bai, J., Zhang, Y., Wang, L., et al.  
696 (2014). A network-based, integrative approach to identify genes with aberrant co-methylation  
697 in colorectal cancer. *Mol Biosyst* 10, 180-190.
- 698 Li, Y., Zhu, J., Tian, G., Li, N., Li, Q., Ye, M., Zheng, H., Yu, J., Wu, H., Sun, J., et al.  
699 (2010). The DNA methylome of human peripheral blood mononuclear cells. *PLoS Biol* 8,  
700 e1000533.
- 701 Libertini, E., Hamoudi, R. A., Heath, S., Lancashire, L., Rubio Garcia, A., Grassi, L.,  
702 Downes, K., Ouwehand, W. H., Javierre, B. M., Cairns, J., et al. (2018). DNA methylation  
703 oscillation defines classes of enhancers. *bioRxiv*.



- 704 Libertini, E., Heath, S. C., Hamoudi, R. A., Gut, M., Ziller, M. J., Czyz, A., Ruotti, V.,  
705 Stunnenberg, H. G., Frontini, M., Ouwehand, W. H., *et al.* (2016). Information recovery from  
706 low coverage whole-genome bisulfite sequencing. *Nat Commun* 7, 11306.
- 707 Liberzon, A., Subramanian, A., Pinchback, R., Thorvaldsdottir, H., Tamayo, P., and Mesirov,  
708 J. P. (2011). Molecular signatures database (MSigDB) 3.0. *Bioinformatics* 27, 1739-1740.
- 709 Lister, R., Pelizzola, M., Dowen, R. H., Hawkins, R. D., Hon, G., Tonti-Filippini, J., Nery, J.  
710 R., Lee, L., Ye, Z., Ngo, Q.-M., *et al.* (2009). Human DNA methylomes at base resolution  
711 show widespread epigenomic differences. *Nature* 462, 315-322.
- 712 Liu, X., Wang, Y., Ji, H., Aihara, K., and Chen, L. (2016). Personalized characterization of  
713 diseases using sample-specific networks. *Nucleic Acids Res* 44, e164.
- 714 Love, M. I., Huber, W., and Anders, S. (2014). Moderated estimation of fold change and  
715 dispersion for RNA-seq data with DESeq2. *Genome Biology* 15, 550.
- 716 MacDonald, W. A., Sachani, S. S., White, C. R., and Mann, M. R. (2015). A role for  
717 chromatin topology in imprinted domain regulation. *Biochem Cell Biol* 94, 43-55.
- 718 Mayor, R., Casadome, L., Azuara, D., Moreno, V., Clark, S. J., Capella, G., and Peinado, M.  
719 A. (2009). Long-range epigenetic silencing at 2q14.2 affects most human colorectal cancers  
720 and may have application as a non-invasive biomarker of disease. *Br J Cancer* 100, 1534-  
721 1539.
- 722 McGarvey, K. M., Van Neste, L., Cope, L., Ohm, J. E., Herman, J. G., Van Criekinge, W.,  
723 Schuebel, K. E., and Baylin, S. B. (2008). Defining a chromatin pattern that characterizes  
724 DNA-hypermethylated genes in colon cancer cells. *Cancer Res* 68, 5753-5759.
- 725 Michieletto, D., Chiang, M., Coli, D., Papantonis, A., Orlandini, E., Cook, P. R., and  
726 Marenduzzo, D. (2018). Shaping epigenetic memory via genomic bookmarking. *Nucleic  
727 Acids Res* 46, 83-93.
- 728 Newman, M. E. (2005). Power laws, Pareto distributions and Zipf's law. *Contemporary  
729 physics* 46, 323-351.
- 730 Newman, M. E., and Girvan, M. (2004). Finding and evaluating community structure in  
731 networks. *Physical review E* 69, 026113.
- 732 Ohm, J. E., McGarvey, K. M., Yu, X., Cheng, L., Schuebel, K. E., Cope, L., Mohammad, H.  
733 P., Chen, W., Daniel, V. C., Yu, W., *et al.* (2007). A stem cell-like chromatin pattern may  
734 predispose tumor suppressor genes to DNA hypermethylation and heritable silencing. *Nat  
735 Genet* 39, 237-242.
- 736 Page, L., Brin, S., Motwani, R., and Winograd, T. (1999). The PageRank citation ranking:  
737 bringing order to the web. Technical Report Stanford InfoLab.
- 738 Portela, A., and Esteller, M. (2010). Epigenetic modifications and human disease. *Nat  
739 Biotechnol* 28, 1057-1068.
- 740 Price, M. E., Cotton, A. M., Lam, L. L., Farre, P., Emberly, E., Brown, C. J., Robinson, W. P.,  
741 and Kobor, M. S. (2013). Additional annotation enhances potential for biologically-relevant  
742 analysis of the Illumina Infinium HumanMethylation450 BeadChip array. *Epigenetics  
743 Chromatin* 6, 4.
- 744 Pujadas, E., and Feinberg, A. P. (2012). Regulated noise in the epigenetic landscape of  
745 development and disease. *Cell* 148, 1123-1131.

- 746 Quinlan, A. R., and Hall, I. M. (2010). BEDTools: a flexible suite of utilities for comparing  
747 genomic features. *Bioinformatics* 26, 841-842.
- 748 Raineri, E., Serra, F., Beekman, R., García Torre, B., Vilarrasa-Blasi, R., Martín-Subero, I.,  
749 Martí-Renom, M., Gut, I., and Heath, S. (2018). Inference of genomic spatial organization  
750 from a whole genome bisulfite sequencing sample. *bioRxiv*.
- 751 Rodriguez, J., Frigola, J., Vendrell, E., Risques, R. A., Fraga, M. F., Morales, C., Moreno, V.,  
752 Esteller, M., Capella, G., Ribas, M., and Peinado, M. A. (2006). Chromosomal instability  
753 correlates with genome-wide DNA demethylation in human primary colorectal cancers.  
754 *Cancer Res* 66, 8462-9468.
- 755 Rodriguez, J., Muñoz, M., Vives, L., Frangou, C. G., Groudine, M., and Peinado, M. A.  
756 (2008). Bivalent domains enforce transcriptional memory of DNA methylated genes in cancer  
757 cells. *Proc Natl Acad Sci U S A* 105, 19809-19814.
- 758 Rulands, S., Lee, H. J., Clark, S. J., Angermueller, C., Smallwood, S. A., Krueger, F.,  
759 Mohammed, H., Dean, W., Nichols, J., Rugg-Gunn, P., et al. (2018). Genome-Scale  
760 Oscillations in DNA Methylation during Exit from Pluripotency. *Cell Syst* 7, 63-76 e12.
- 761 Saha, A., Kim, Y., Gewirtz, A. D. H., Jo, B., Gao, C., McDowell, I. C., Engelhardt, B. E., and  
762 Battle, A. (2017). Co-expression networks reveal the tissue-specific regulation of transcription  
763 and splicing. *Genome Res* 27, 1843-1858.
- 764 Salhab, A., Nordström, K., Kattler, K., Ebert, P., Ramirez, F., Arrigoni, L., Müller, F.,  
765 Cadenas, C., Hengstler, J., Lengauer, T., et al. (2018). Partially methylated domains are  
766 hallmarks of a cell specific epigenome topology. *bioRxiv*.
- 767 Sandoval, J., Heyn, H., Moran, S., Serra-Musach, J., Pujana, M. A., Bibikova, M., and  
768 Esteller, M. (2011). Validation of a DNA methylation microarray for 450,000 CpG sites in the  
769 human genome. *Epigenetics* 6, 692-702.
- 770 Sanz-Pamplona, R., Lopez-Doriga, A., Pare-Brunet, L., Lazaro, K., Bellido, F., Alonso, M.  
771 H., Ausso, S., Guino, E., Beltran, S., Castro-Giner, F., et al. (2015). Exome Sequencing  
772 Reveals AMER1 as a Frequently Mutated Gene in Colorectal Cancer. *Clin Cancer Res* 21,  
773 4709-4718.
- 774 Schubeler, D. (2015). Function and information content of DNA methylation. *Nature* 517,  
775 321-326.
- 776 Shakhbazov, K., Powell, J. E., Hemani, G., Henders, A. K., Martin, N. G., Visscher, P. M.,  
777 Montgomery, G. W., and McRae, A. F. (2016). Shared genetic control of expression and  
778 methylation in peripheral blood. *BMC Genomics* 17, 278.
- 779 Shannon, P., Markiel, A., Ozier, O., Baliga, N. S., Wang, J. T., Ramage, D., Amin, N.,  
780 Schwikowski, B., and Ideker, T. (2003). Cytoscape: a software environment for integrated  
781 models of biomolecular interaction networks. *Genome Res* 13, 2498-2504.
- 782 Shoemaker, R., Deng, J., Wang, W., and Zhang, K. (2010). Allele-specific methylation is  
783 prevalent and is contributed by CpG-SNPs in the human genome. *Genome Res* 20, 883-889.
- 784 Silva-Martinez, G. A., Zaina, S., and Lund, G. (2017). Array probe density and  
785 pathobiological relevant CpG calling bias in human disease and physiological DNA  
786 methylation profiling. *Brief Funct Genomics*.
- 787 Smyth, G. K. (2005). Limma: linear models for microarray data. In *Bioinformatics and  
788 Computational Biology Solutions Using R and Bioconductor*, R. Gentleman, V. Carey, S.  
789 Dudoit, R. Irizarry, and W. Huber, eds. (New York: Springer), pp. 397–420.

- 790 Sole, X., Crous-Bou, M., Cordero, D., Olivares, D., Guino, E., Sanz-Pamplona, R.,  
791 Rodriguez-Moranta, F., Sanjuan, X., de Oca, J., Salazar, R., and Moreno, V. (2014).  
792 Discovery and validation of new potential biomarkers for early detection of colon cancer.  
793 PLoS ONE 9, e106748.
- 794 Teschendorff, A. E., and Relton, C. L. (2018). Statistical and integrative system-level analysis  
795 of DNA methylation data. *Nat Rev Genet* 19, 129-147.
- 796 Venables, W. N., and Ripley, B. D. (2002). *Modern Applied Statistics with S*, Fourth edn  
797 (New York: Springer).
- 798 Wang, X., Qiu, W., and Zamar, R. H. (2007). CLUES: A non-parametric clustering method  
799 based on local shrinking. *Computational Statistics & Data Analysis* 52, 286-298.
- 800 Wang, Y., Liu, T., Xu, D., Shi, H., Zhang, C., Mo, Y. Y., and Wang, Z. (2016). Predicting  
801 DNA Methylation State of CpG Dinucleotide Using Genome Topological Features and Deep  
802 Networks. *Sci Rep* 6, 19598.
- 803 Yin, Y., Morgunova, E., Jolma, A., Kaasinen, E., Sahu, B., Khund-Sayeed, S., Das, P. K.,  
804 Kivioja, T., Dave, K., Zhong, F., *et al.* (2017). Impact of cytosine methylation on DNA  
805 binding specificities of human transcription factors. *Science* 356.
- 806 Zhang, B., and Horvath, S. (2005). A general framework for weighted gene co-expression  
807 network analysis. *Statistical applications in genetics and molecular biology* 4, 1128.
- 808 Zhang, H., Meltzer, P., and Davis, S. (2013). RCircos: an R package for Circos 2D track  
809 plots. *BMC Bioinformatics* 14, 244.
- 810 Zhang, J., and Huang, K. (2017). Pan-cancer analysis of frequent DNA co-methylation  
811 patterns reveals consistent epigenetic landscape changes in multiple cancers. *BMC Genomics*  
812 18, 1045.
- 813 Zhang, L., Xie, W. J., Liu, S., Meng, L., Gu, C., and Gao, Y. Q. (2017). DNA Methylation  
814 Landscape Reflects the Spatial Organization of Chromatin in Different Cells. *Biophys J* 113,  
815 1395-1404.
- 816 Zhao, S., Fung-Leung, W.-P., Bittner, A., Ngo, K., and Liu, X. (2014). Comparison of RNA-  
817 Seq and microarray in transcriptome profiling of activated T cells. *PLoS ONE* 9, e78644.
- 818 Zheng, X., Zhang, N., Wu, H.-J., and Wu, H. (2017). Estimating and accounting for tumor  
819 purity in the analysis of DNA methylation data from cancer studies. *Genome Biology* 18, 17.
- 820 Zhu, Y., Qiu, P., and Ji, Y. (2014). TCGA-assembler: open-source software for retrieving and  
821 processing TCGA data. *Nat Methods* 11, 599-600.
- 822
- 823

# Figure 1

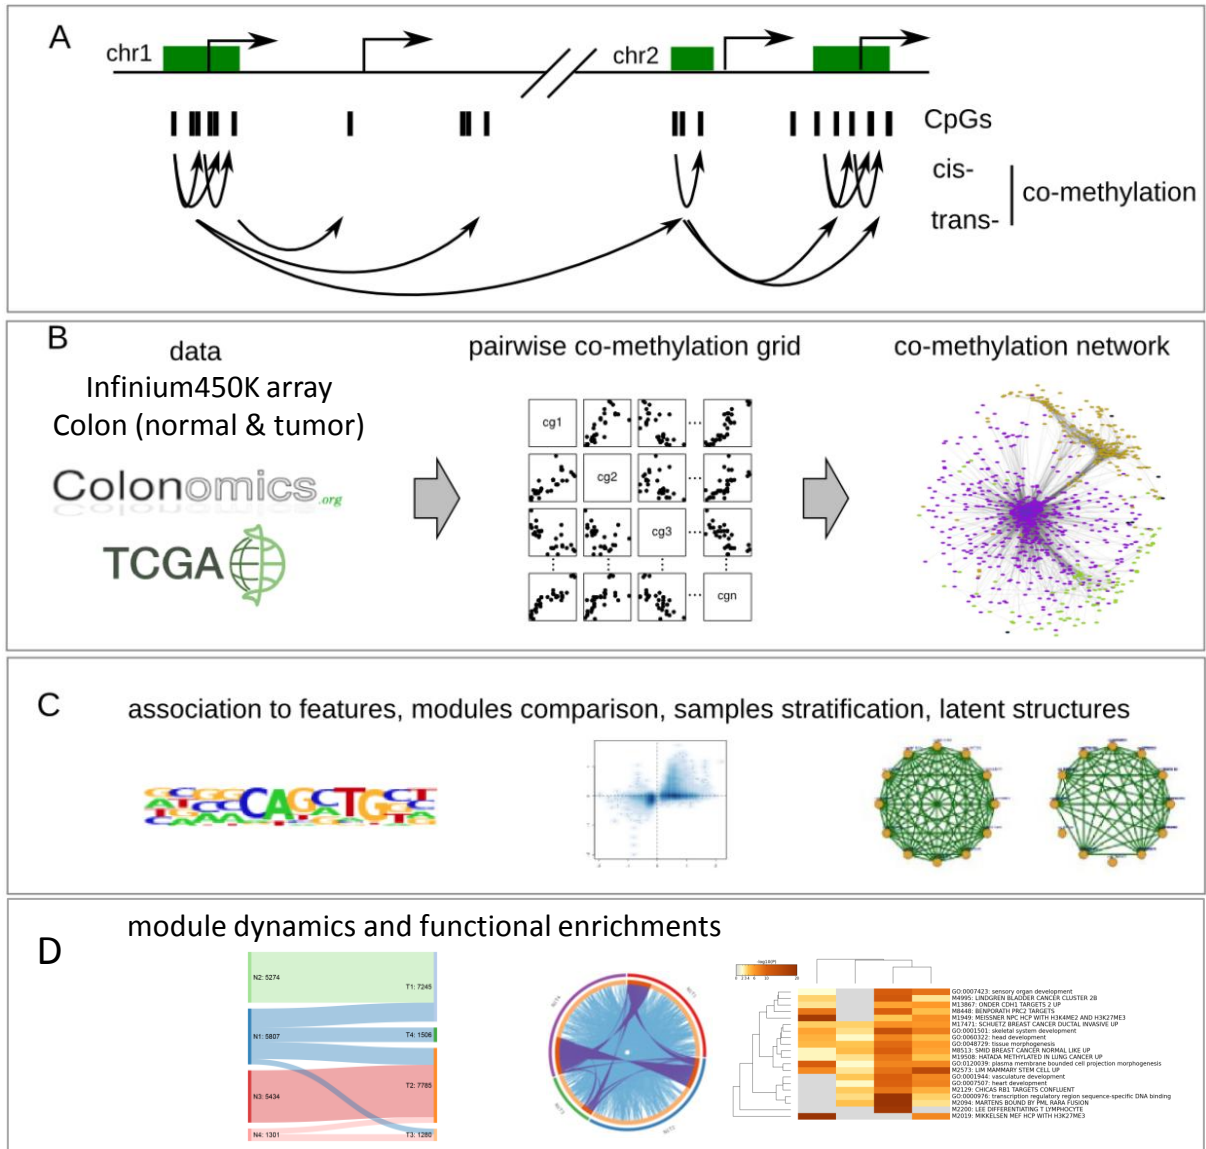

# Figure 2

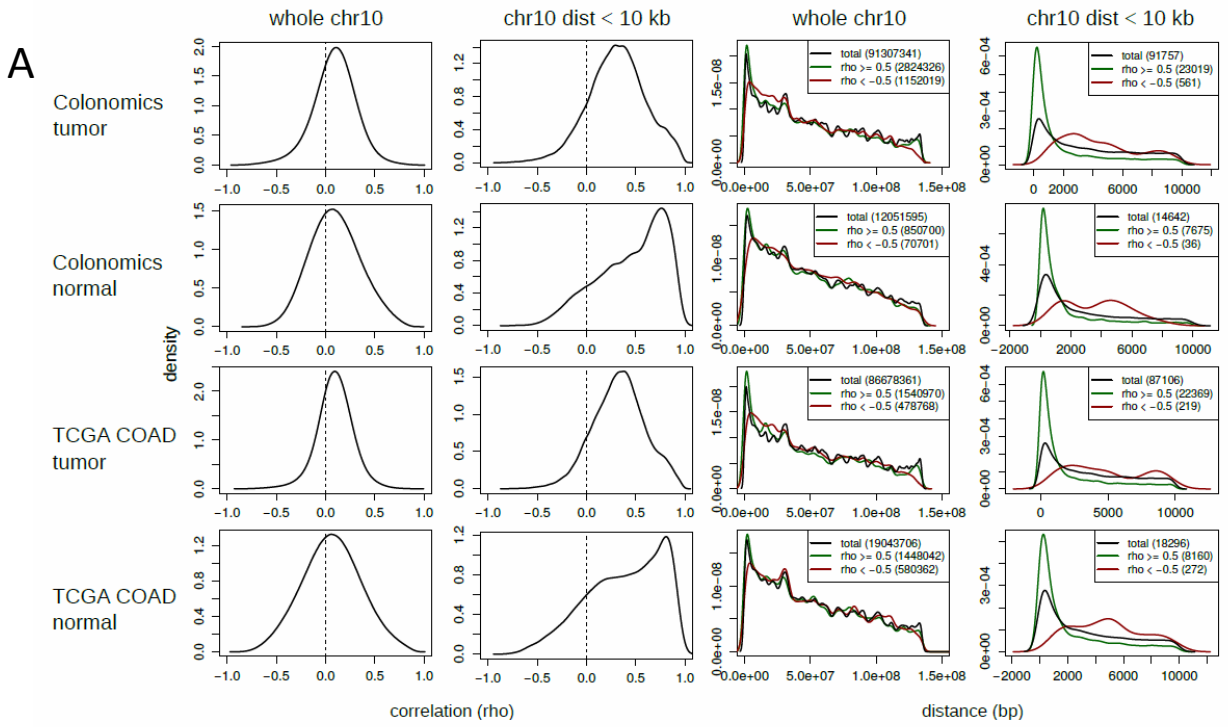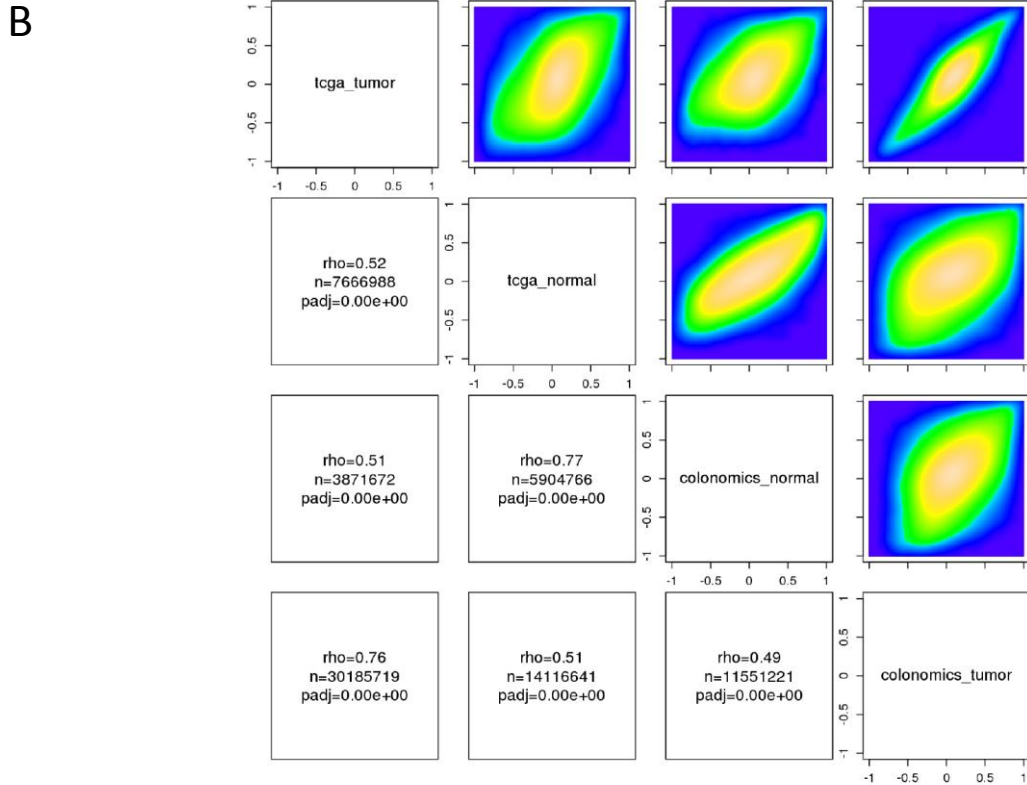

Figure 3

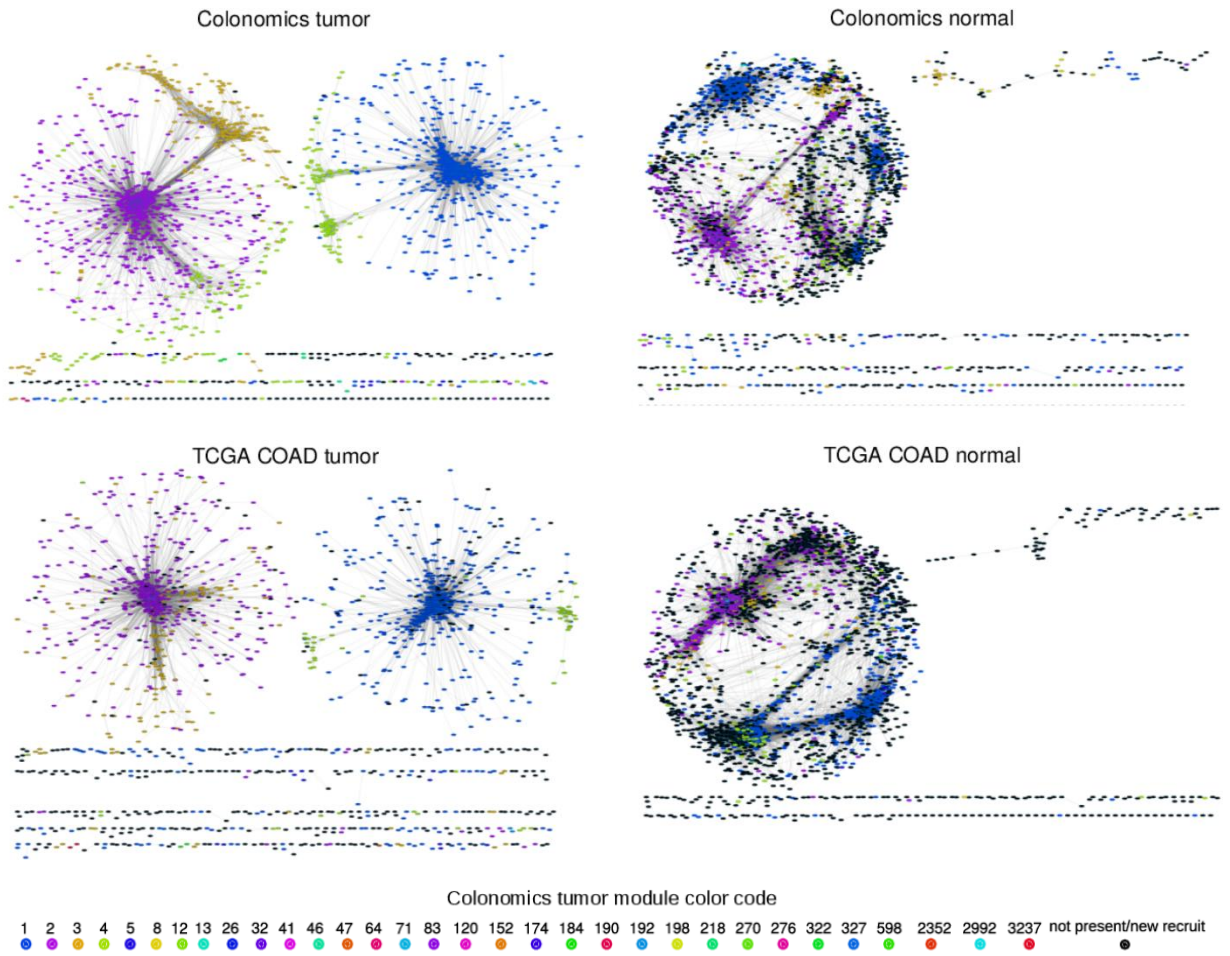

Figure 4

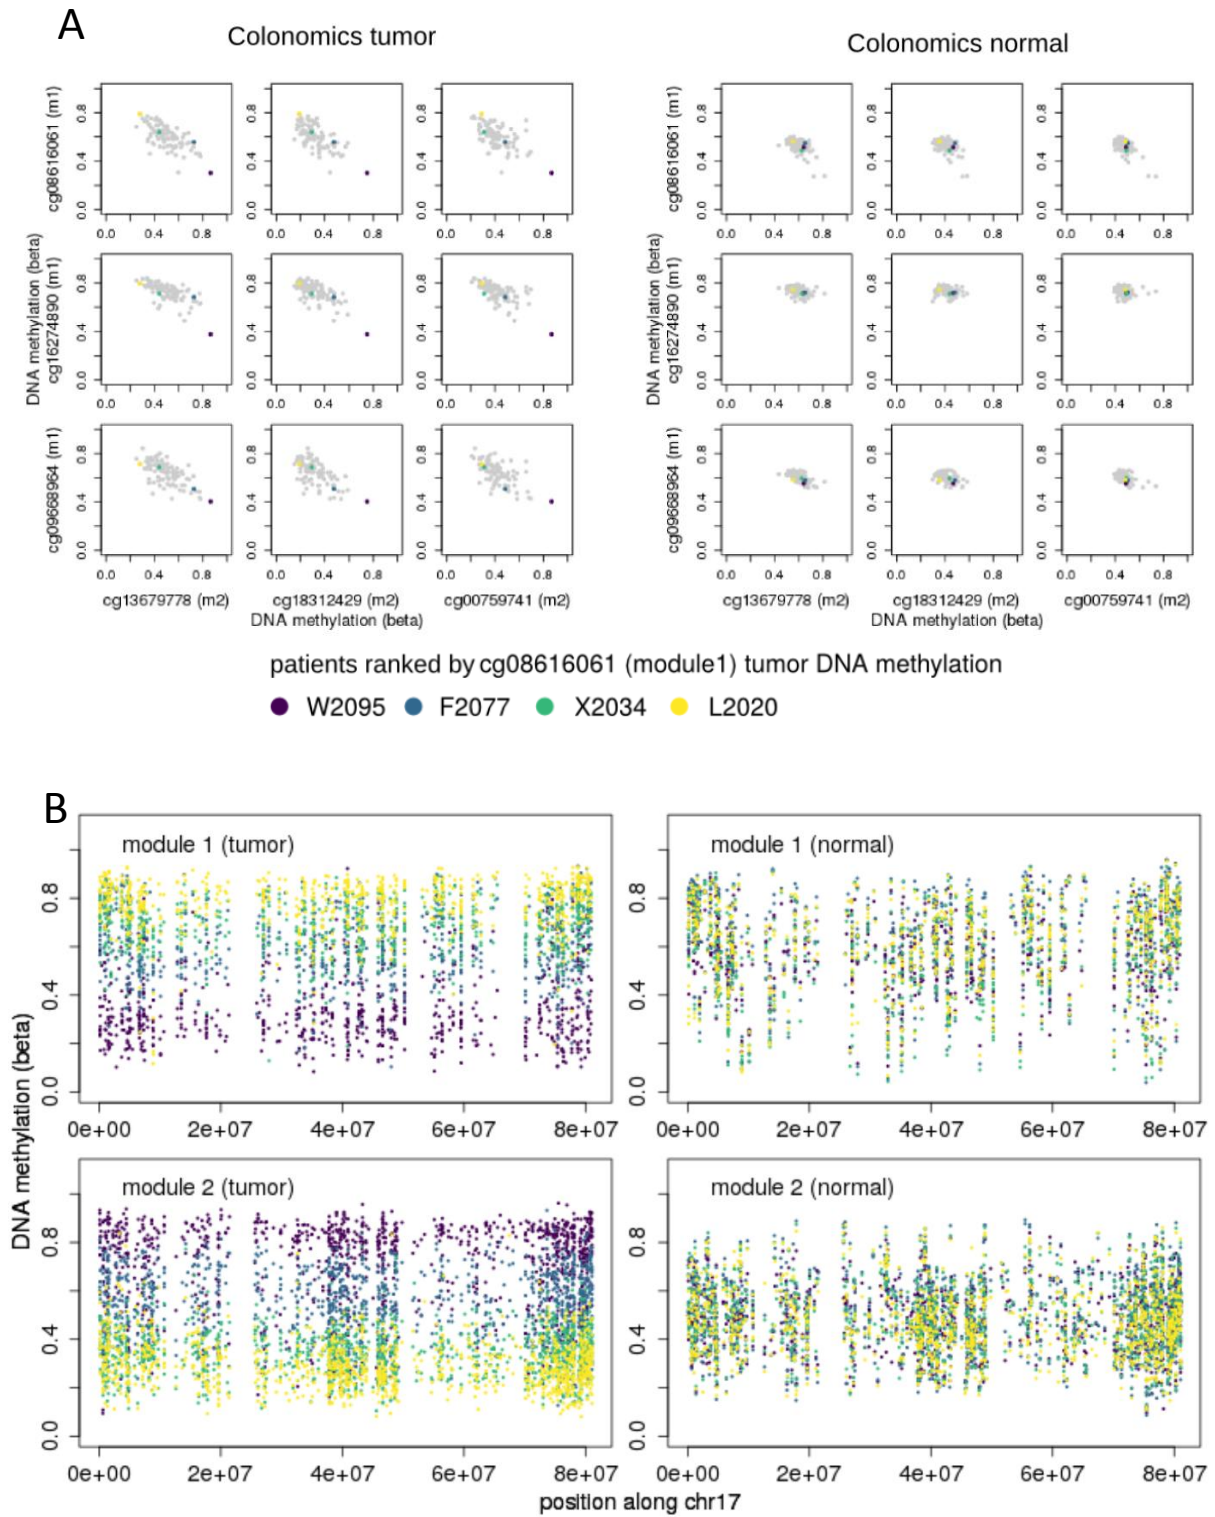

Figure 5

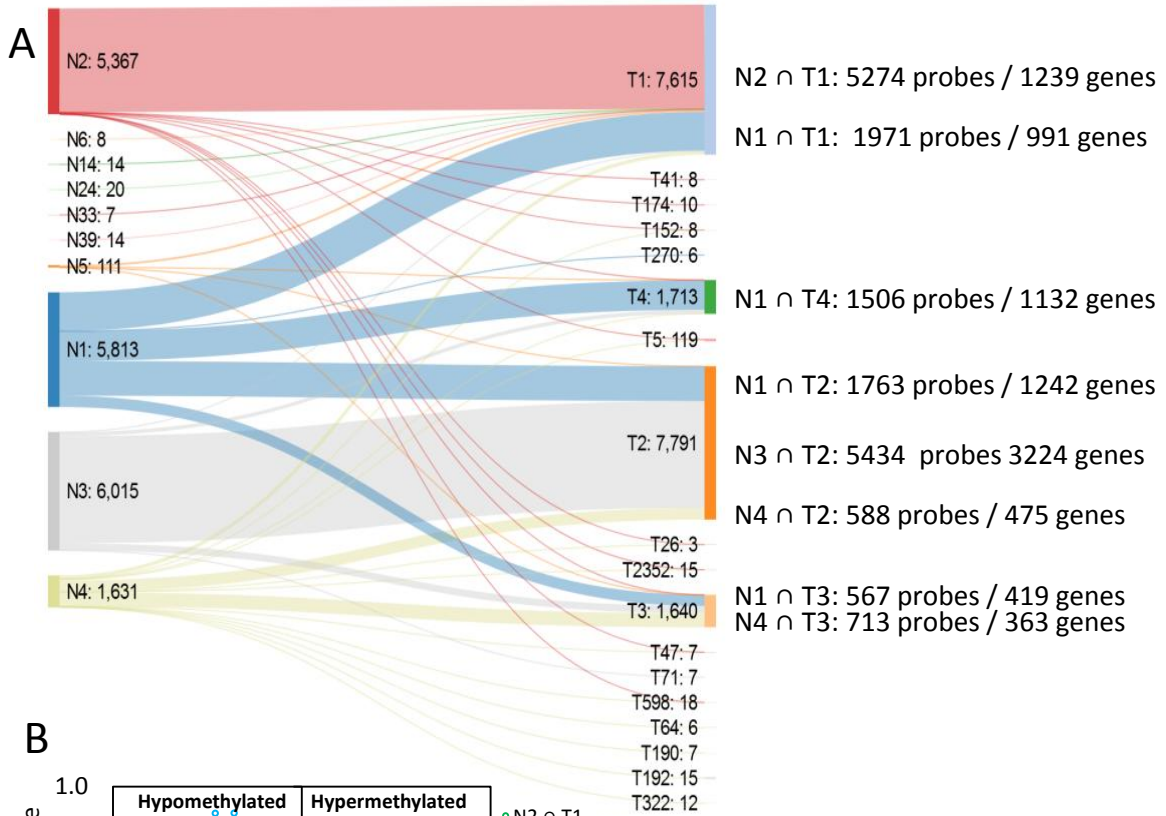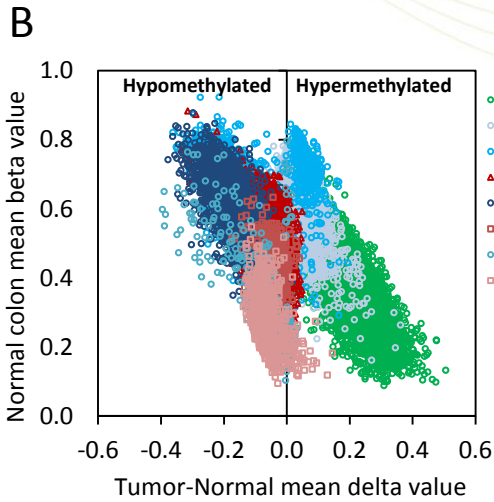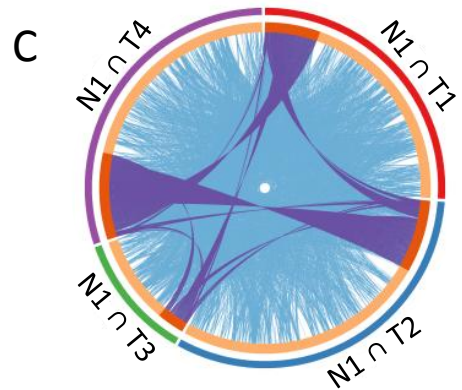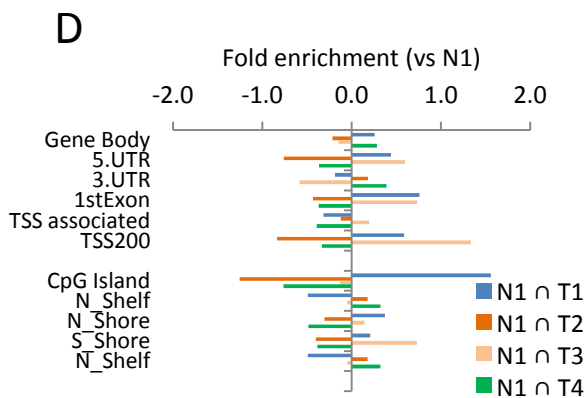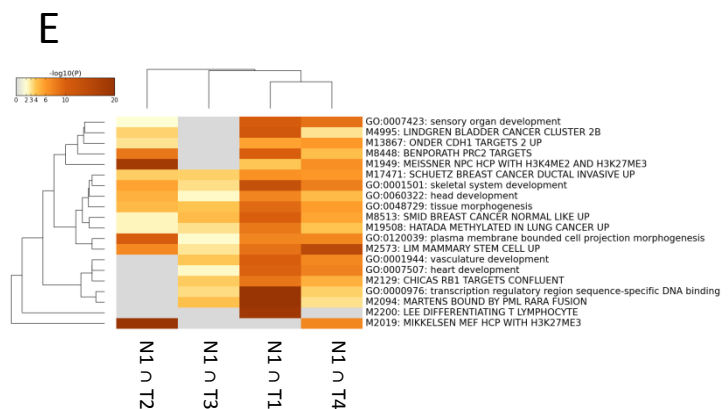



# Figure 6

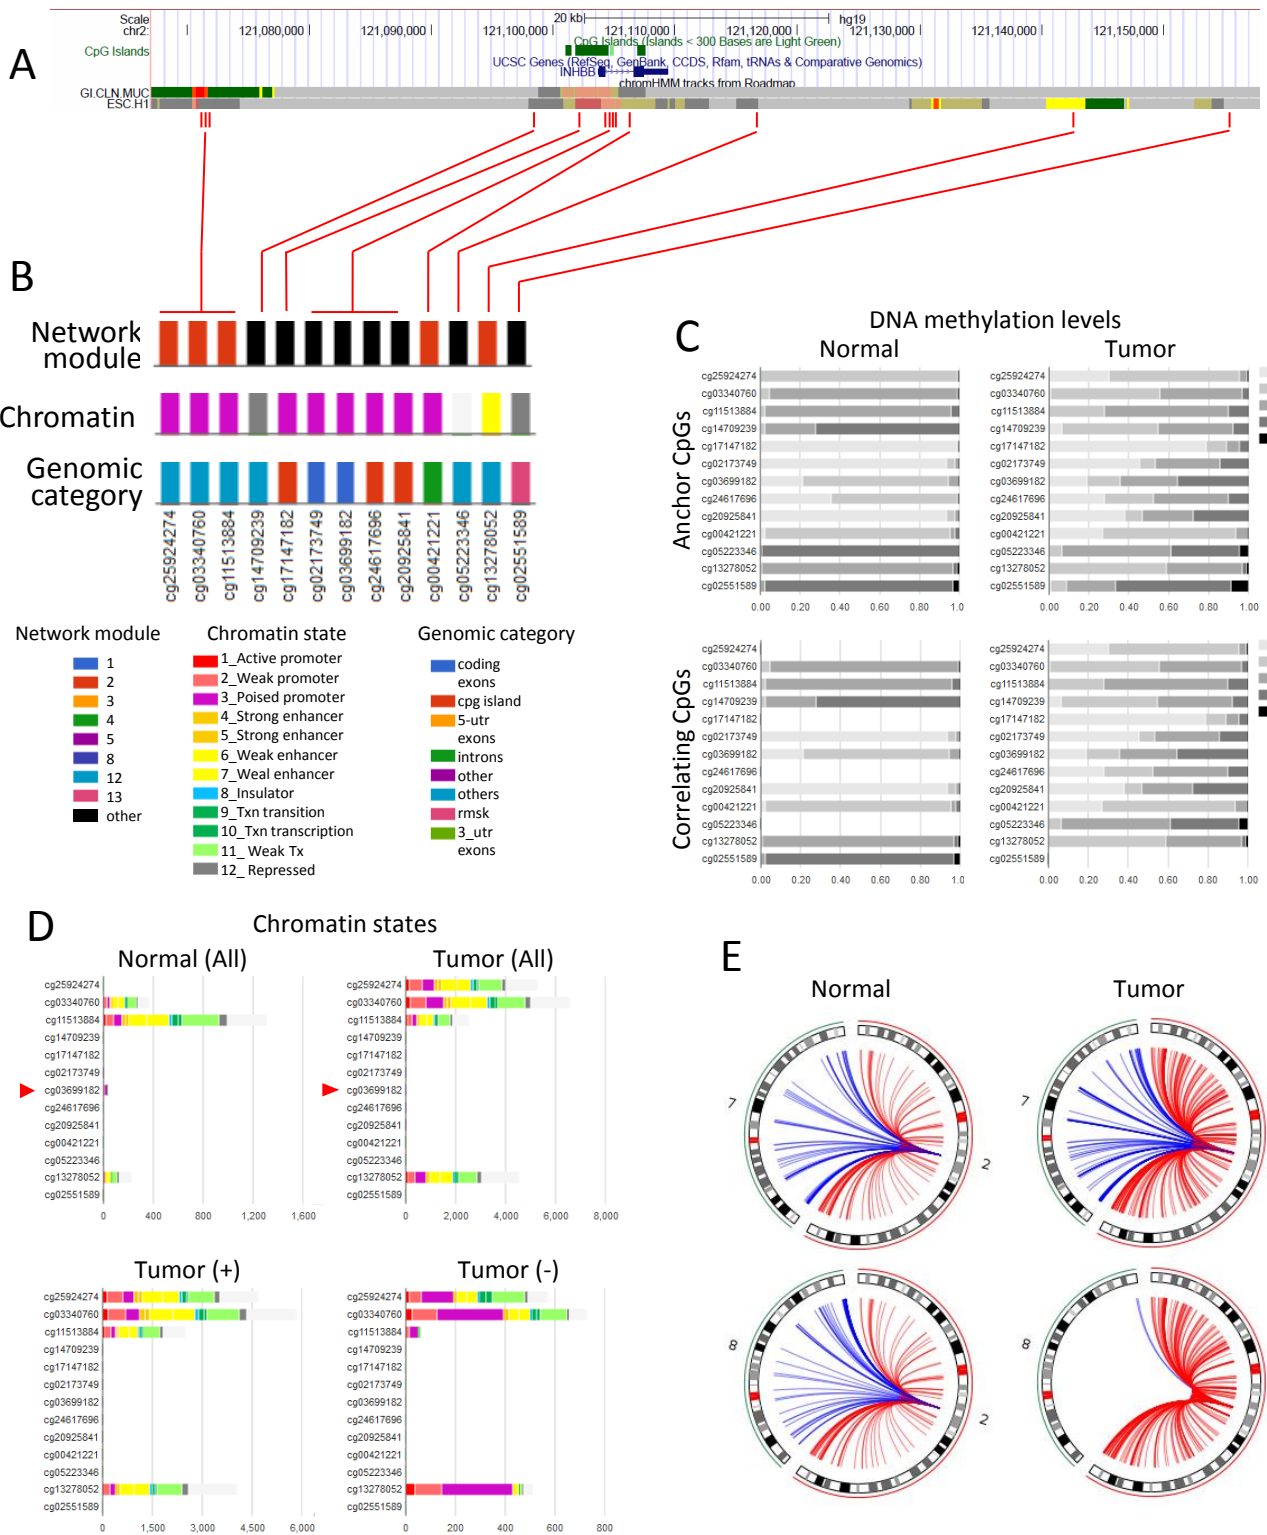

Source: https://www.biorxiv.org/content/10.1101/428730v1.full.pdf
